# Supplementary material for: Tangential Flow Ultrafiltration Allows Purification and Concentration of Lauric Acid-/Albumin-Coated Particles for Improved Magnetic Treatment
Source: MDPI journal article supplement (doi:10.3390/ijms160819291), 2015-08-14
Supplement: s1 [file s1]

## Supplementary Information

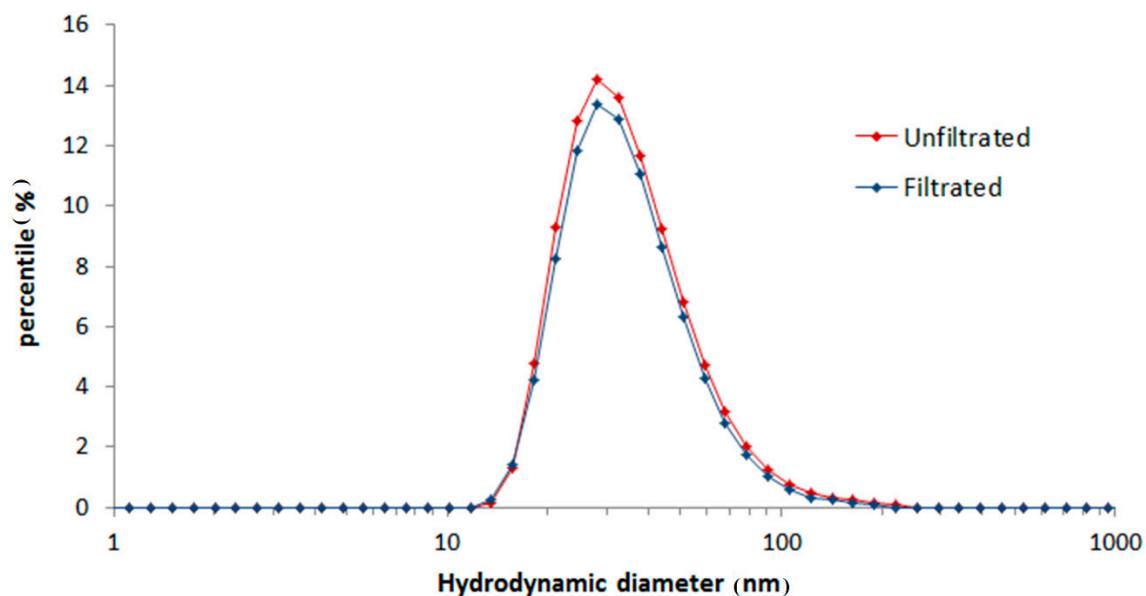

**Figure S1.** Size distribution of SEON<sup>LA-BSA</sup> at pH 7 before (red dots) and after (blue dots) filtration. Both samples are displayed as distribution by volume. The dots represent the mean of  $n = 3$  individual measurements. The lines are drawn to guide the eye.

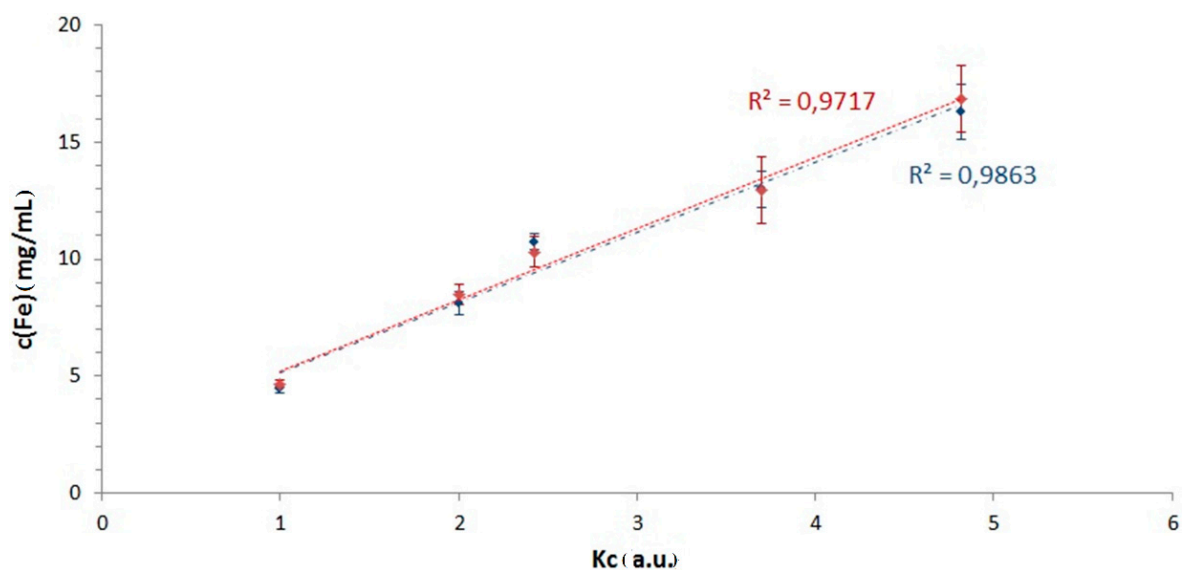

**Figure S2.** Comparison of iron content measurements with UV-VIS and MP-AES. SEON<sup>LA-BSA</sup> samples with different concentration factors  $K_C$  were measured by UV-VIS (Red dots and regression line) and MP-AES (Blue dots and regression line). All measurements were performed in triplicates. The values are displayed as mean  $\pm$  standard deviation.
